# Supplementary material
Source: PubMed Central journal article supplement (PMC10656994)
Supplement: NIHMS1941344-supplement-Supplementary_Information.pdf [file NIHMS1941344-supplement-Supplementary_Information.pdf]

## Supplemental table

| Material / Hydrogel                                      | Natural / Synthetic / Hybrid?<br><br>Fibrous?                             | Elastic modulus (i.e. stiffness) | Viscoelastic?<br><br>Viscoplastic?<br><br>Non-linear elastic? | Pore size       | Degradable?                                           | Overall view                                                                                                                                                                                                                                | Refs.           |
|----------------------------------------------------------|---------------------------------------------------------------------------|----------------------------------|---------------------------------------------------------------|-----------------|-------------------------------------------------------|---------------------------------------------------------------------------------------------------------------------------------------------------------------------------------------------------------------------------------------------|-----------------|
| Collagen-1                                               | - Natural ECM<br>- Fibrous                                                | ~0.01-1 kPa                      | - Yes<br>- Yes<br>- Yes                                       | ~0.1-10 $\mu$ m | Yes                                                   | Widely used for 3D cell culture and as a model of stromal matrix. Properties can be varied by modulating collagen density and increased covalent crosslinking, so that properties are not independently tunable.                            | <sup>1,2</sup>  |
| Reconstituted basement membrane (rBM), Matrigel, Geltrex | - Natural ECM<br>- Nonfibrous                                             | ~0.02-0.5 kPa                    | - Yes<br>- Yes<br>- No                                        | ~nm             | Yes                                                   | Widely used for organoid and tumor spheroid culture. High lot-to-lot variability. Stiffness can be increased by increasing rBM density, so that properties are not independently tunable.                                                   | <sup>3,4</sup>  |
| Fibrin                                                   | - Natural ECM<br>- Fibrous                                                | ~0.01-1 kPa                      | - Yes<br>- Yes<br>- Yes                                       | ~2 $\mu$ m      | Yes                                                   | Especially relevant for studying wound healing and clot formation. Properties can be varied by modulating fibrinogen density and increased covalent crosslinking, so that properties are not independently tunable.                         | <sup>5</sup>    |
| Hyaluronic acid                                          | - Natural ECM;<br>requires modification for crosslinking.<br>- Nonfibrous | ~0.01-3.5 kPa                    | - Yes<br>- Yes<br>- Yes                                       | ~nm             | Yes                                                   | Used particularly in models of brain and cartilage. Various crosslinking chemistries can be introduced to form HA hydrogels. Typically coupled with RGD-cell adhesion peptide motif to promote integrin-adhesions.                          | <sup>6</sup>    |
| Alginate                                                 | - Natural Biomaterial<br>- Nonfibrous                                     | ~1-110 kPa                       | - Yes<br>- Yes<br>- Yes                                       | ~nm             | Not susceptible to degradation by mammalian proteases | Can be crosslinked ionically with divalent cations, or covalently crosslinked with various chemistries. Mechanical properties can be independently tuned by varying ionic crosslinking density and molecular weight.                        | <sup>7,8</sup>  |
| Polyethylene glycol (PEG)                                | - Synthetic<br>- Nonfibrous                                               | ~1-100 kPa                       | Depends on crosslinking modality                              | ~nm             | Depends on crosslinking modality                      | Amenable to various crosslinking chemistries. Often coupled to RGD to promote cell adhesion and with MMP degradable crosslinks. Stiffness increased typically by increasing polymer density. Mechanical properties can be temporally tuned. | <sup>9,10</sup> |
| Polyacrylamide                                           | - Synthetic<br>- Nonfibrous                                               | ~0.5-115 kPa                     | - No<br>- No<br>- No                                          | ~nm             | No                                                    | Wide mechanical tunability. Shows linearly elastic behavior. Cannot be readily used for 3D cell culture owing to toxicity of precursor solutions.                                                                                           | <sup>11</sup>   |
| Agarose                                                  | - Natural Biomaterial<br>- Nonfibrous                                     | ~2-100 kPa                       | - Yes<br>- Yes<br>- No                                        | ~nm             | No                                                    | Thermosensitive hydrogel. Exhibits nearly linear elastic properties. Mechanical properties varied by modulating polymer concentration.                                                                                                      | <sup>1</sup>    |

**Table: Common hydrogels used for 3D cell culture.** Several natural and synthetic hydrogel formulations have been developed with different levels of modularity, mechanical tunability and temporal control of properties.

## References

- 1 Nam, S., Hu, K. H., Butte, M. J. & Chaudhuri, O. Strain-enhanced stress relaxation impacts nonlinear elasticity in collagen gels. *Proceedings of the National Academy of Sciences* **113**, 5492-5497, doi:[10.1073/pnas.1523906113](https://doi.org/10.1073/pnas.1523906113) (2016).
- 2 Paszek, M. J. *et al.* Tensional homeostasis and the malignant phenotype. *Cancer Cell* **8**, 241-254, doi:<https://doi.org/10.1016/j.ccr.2005.08.010> (2005).
- 3 Wisdom, K. M. *et al.* Covalent cross-linking of basement membrane-like matrices physically restricts invasive protrusions in breast cancer cells. *Matrix Biology* **85-86**, 94-111, doi:<https://doi.org/10.1016/j.matbio.2019.05.006> (2020).
- 4 Chaudhuri, O. *et al.* Extracellular matrix stiffness and composition jointly regulate the induction of malignant phenotypes in mammary epithelium. *Nature Materials* **13**, 970-978, doi:10.1038/nmat4009 (2014).
- 5 Nam, S., Lee, J., Brownfield, Doug G. & Chaudhuri, O. Viscoplasticity Enables Mechanical Remodeling of Matrix by Cells. *Biophysical Journal* **111**, 2296-2308, doi:<https://doi.org/10.1016/j.bpj.2016.10.002> (2016).
- 6 Khetan, S. *et al.* Degradation-mediated cellular traction directs stem cell fate in covalently crosslinked three-dimensional hydrogels. *Nature Materials* **12**, 458-465, doi:10.1038/nmat3586 (2013).
- 7 Chaudhuri, O. *et al.* Hydrogels with tunable stress relaxation regulate stem cell fate and activity. *Nature Materials* **15**, 326-334, doi:10.1038/nmat4489 (2016).
- 8 Charbonier, F., Indana, D. & Chaudhuri, O. Tuning Viscoelasticity in Alginate Hydrogels for 3D Cell Culture Studies. *Current Protocols* **1**, e124, doi:<https://doi.org/10.1002/cpz1.124> (2021).
- 9 Chrisnandy, A., Blondel, D., Rezakhani, S., Brogiere, N. & Lutolf, M. P. Synthetic dynamic hydrogels promote degradation-independent in vitro organogenesis. *Nature Materials* **21**, 479-487, doi:10.1038/s41563-021-01136-7 (2022).
- 10 Cruz-Acuña, R. *et al.* Synthetic hydrogels for human intestinal organoid generation and colonic wound repair. *Nature Cell Biology* **19**, 1326-1335, doi:10.1038/ncb3632 (2017).
- 11 Wang, Y.-I. & Li, D. Creating Complex Polyacrylamide Hydrogel Structures Using 3D Printing with Applications to Mechanobiology. *Macromolecular Bioscience* **20**, 2000082, doi:<https://doi.org/10.1002/mabi.202000082> (2020).
